# Supplementary material for: Divergent Secondary Metabolites and Habitat Filtering Both Contribute to Tree Species Coexistence in the Peruvian Amazon
Source: Front Plant Sci. 2018 Jun 19;9:836. doi: 10.3389/fpls.2018.00836 (PMC6018647; doi:10.3389/fpls.2018.00836)
Supplement: Supplementary file 7 [file Data_Sheet_6.xlsx]

## Sheet: AppS5
Appendix S5. Geographical coordinates and soil variables' values in each plot
Plot	x	y	CN	NO3-	P	K	Ca	Mg	Sand	Silt	Clay
T01	674764	9.56045e+06	17.17	0.55	2.4	0.06	0.05	0.05	93	4	3
T02	674632	9560373	16.62	0.18	2.7	0.03	0.005	0.03	75	20	5
T03	660678	9566791	18.36	6.91	28.6	0.12	0.07	0.14	41	53	6
T04	660658	9569683	9.53	0.05	7	0.18	0.09	0.19	11	38	51
T05	659861	9569651	10.13	0.05	6.2	0.2	0.1	0.17	12	21	67
T06	633058	9568224	9.18	7.31	7.1	0.14	0.05	0.15	15	47	38
T07	626144	9571524	27.04	0.05	10.1	0.06	0.005	0.07	93	4	3
T08	633158	9568124	8.67	4	6.9	0.06	0.02	0.05	34	34	32
T09	630974	9569990	21.58	0.05	6.8	0.04	0.12	0.03	93	4	3
T10	655646	9576176	9.55	2.77	0.05	0.06	0.46	0.12	15	48	37
T11	655646	9576176	20	0.05	3.1	0.03	0.005	0.03	66	30	4
T12	601576	9584711	11.65	0.05	7.2	0.1	0.04	0.09	43	43	14
T13	601210	9.58392e+06	28.71	0.05	6.3	0.05	0.005	0.04	73	23	4
T14	651946	9.45828e+06	21.72	0.64	4	0.03	0.02	0.03	69	28	3
T15	654010	9.4555e+06	12.19	3.36	2.7	0.03	0.01	0.03	56	23	21
T16	653718	9.45639e+06	12.21	9.41	5.2	0.06	0.02	0.06	51	15	34
T17	649914	9460482	9.81	7.31	18.6	0.32	16.48	3.72	5	32	63
T18	641660	9454571	13	0.41	17.8	0.21	19.06	1.37	24	60	16
T19	639564	9.46579e+06	8.17	0.38	1.4	0.1	9.4	1.14	16	58	26
T20	645882	9582338	10.48	3.19	1.5	0.04	0.12	0.08	53	24	23
T21	643221	9576554	11.85	2.55	1.3	0.03	0.03	0.03	59	14	27
T22	644504	9579061	8.07	0.66	2.2	0.08	0.04	0.08	13	48	39
T23	669712	9543442	10.63	14.71	4.3	0.06	0.03	0.06	49	27	24
T24	668432	9.53885e+06	8.24	4.91	0.05	0.11	0.14	0.18	18	35	47
T25	641243	9346843	18.86	1.93	9.6	0.09	0.08	0.08	63	34	3
T26	640819	9345883	22.14	0.05	3.4	0.02	0.02	0.02	53	45	2
T27	636730	9.34922e+06	18.46	4.76	19.8	0.1	0.06	0.1	64	33	3
T28	635156	9352805	17.84	0.34	16.5	0.1	0.04	0.08	61	37	2
T29	623521	9.3844e+06	7.36	17.01	4.2	0.18	7.65	1.53	11	43	46
T30	627623	9390551	7.5	9.11	1.1	0.23	1.24	0.91	10	21	69
T31	630842	9440639	12.14	14.96	3	0.04	0.03	0.05	59	8	33
T32	627856	9426578	11.67	30.71	3.4	0.07	0.02	0.07	41	20	39
T33	250996	9523048	19.47	1.41	2.1	0.02	0.02	0.03	19	31	50
T34	251289	9524516	17.93	1.17	2.2	0.02	0.02	0.02	33	44	23
T35	264158	9498673	7.46	1.3	2.4	0.2	11.18	3.41	38	21	41
T36	263435	9498784	8.4	14.5	2.9	0.16	9.61	3.21	27	10	63
T37	266371	9500216	8.83	4.39	1.2	0.06	0.54	2.03	87	9	4
T38	317074	9473183	11.97	18.95	3	0.07	0.03	0.08	84	9	7
